# Supplementary material for: Guanine deaminase provides evidence of the increased caffeine content during the piling process of pu'erh tea
Source: Royal Society of Chemistry journal article supplement (doi:10.1039/c9ra05655f), 2019-01-01
Supplement: c9ra05655f1.pdf [file c9ra05655f1.pdf]

Supplementary Table S1 The main eukaryotic microorganisms in pu'erh tea

| <i>Phylum</i>                          | <i>Class</i>                                                                                         | <i>Genera</i>                                              | <i>Species</i>                                                                      |
|----------------------------------------|------------------------------------------------------------------------------------------------------|------------------------------------------------------------|-------------------------------------------------------------------------------------|
| Ascomycota                             | Saccharomycetes                                                                                      | <i>Yarrowia</i> (Lyu et al., 2013)                         |                                                                                     |
|                                        |                                                                                                      | <i>Saccharomyces</i> (Zhao et al., 2005; Lyu et al., 2013) | <i>Saccharomyces cerevisiae</i> (Zhang et al., 2012; Li et al., 2017)               |
|                                        |                                                                                                      | <i>Stephanoascus</i>                                       | <i>Stephanoascus ciferri</i> (Yang et al., 2013)                                    |
|                                        |                                                                                                      | <i>Blastobotrys</i>                                        | <i>Blastobotrys adenivorans</i> (Abe et al., 2008; Yang et al., 2013)               |
|                                        | Eurotiomycetes                                                                                       | <i>Aspergillus</i> (Zhao et al., 2005)                     | <i>Aspergillus niger</i> (Zhao et al., 2005; Zhang et al., 2012; Abe et al., 2008); |
|                                        |                                                                                                      |                                                            | <i>Aspergillus glaucus</i> (Zhao et al., 2005);                                     |
|                                        |                                                                                                      | <i>Aspergillus fumigatus</i> (Yang et al., 2013);          |                                                                                     |
| <i>Penicillium</i> (Zhao et al., 2005) | <i>Penicillium chrysogenum</i> (Zhao et al., 2005); <i>Penicillium glabrum</i> (Zhang et al., 2012); |                                                            |                                                                                     |
|                                        | <i>Penicillium brocae</i> (Zhang et al., 2016)                                                       |                                                            |                                                                                     |
| Zygomycota                             | Phycomycetes                                                                                         | <i>Rhizomucor</i>                                          | <i>Rhizomucor pusillus</i> (Zhang et al., 2016; Ma et al., 2017)                    |

## Reference

- L. F. Zhao, H. J. Zhou, Study on the main microbes of Yunnan puer tea during pile-fermentation process[J]. *J. Shangqiu Teach. Coll*, 2005, 21, 129-133.
- L. F. Zhao, Y. J. Xu, H. J. Zhou, Research on microbes improvequality and flavor of pu'er tea in solid fermentation[J]. *Food Res. Develop*, 2006, 27, 155-156.
- K. C. Jeng, C. S. Chen, Y. P. Fang, R. C. W. Hou, Y. S. Chen, Effect of microbial fermentation on content of statin, GABA, and polyphenols in pu-erh tea[J]. *J. Agric. Food Chem*, 2007, 55, 8787–8792.
- C. Lyu, C. Chen, F. Ge, D. Liu, S. Zhao and D. Chen, A preliminary metagenomic study of puer tea during pile fermentation[J]. *J. Sci Food Agric.*, 2013, 93(13), 3165-3174.
- Y. Zhang, S. X. Zhao, H. Z. Liang, W. Li, F. T. Zhao, W. C. Li, Changes of fungal community in puer tea fermentation[J]. *China Brewing*, 2012, 31(1), 122-125.
- X. L. Li, H. H. Chen , J. L. Zhang, et al. The effects of a *Saccharomycetes* strain on the main functional ingredients of pu-er tea[J]. *Food Res. Develop*, 2017, 38(21), 167-172.
- M. Abe, N. Takaoka, Y. Idemoto, C. Takagi, T. Imai, K. Nakasaki, Characteristic fungi observed in the fermentation process for pu-erh tea[J]. *International Journal of Food Microbiology*, 2008, 124(2), 199-203.
- Y. J. Zhang , I. Skaar , M. Sulyok, X. Z. Liu, The microbiome and metabolites in fermented pu-erh tea as revealed by high-throughput sequencing and quantitative multiplex metabolite analysis[J]. *PLOS ONE*, 2016, 11(6), e0157847.

Y. Ma , S. M. Duan , D. L. Zhang , X. Q. Su , D. Y. Zhang , C. Y. Lv , M Zhao,  
Microbial succession and the dynamics of chemical[J]. Appl. Sci. 2017, 7, 1-16.

X. P. Yang, J. F. Luo , X. Liu, T. X. Liu, W. T. Lin, Microbial community structure  
and change during solid fermentation of pu-erh tea[J]. Food Sci, 2013, 34(19), 142-  
147.
